# Supplementary material
Source: PubMed Central journal article supplement (PMC4094252)
Supplement: ml500141f_si_001.pdf [file ml500141f_si_001.pdf]

***Supporting Information for***  
**Novel hybrids of natural oridonin bearing nitrogen  
mustards as potential anticancer drug candidates**

Shengtao Xu<sup>†</sup>, Lingling Pei<sup>†</sup>, Chengqian Wang<sup>†</sup>, Yun-Kai Zhang<sup>‡</sup>, Dahong Li<sup>†,§</sup>,  
Hequan Yao<sup>†</sup>, Xiaoming Wu<sup>†</sup>, Zhe-Sheng Chen<sup>‡,\*</sup>, Yijun Sun<sup>^</sup> and Jinyi Xu<sup>†,\*</sup>

<sup>†</sup>State Key Laboratory of Natural Medicines and Department of Medicinal Chemistry, China  
Pharmaceutical University, 24 Tongjia Xiang, Nanjing 210009, China

<sup>‡</sup>College of Pharmacy and Health Sciences, St. John's University, 8000 Utopia Parkway, Queens, New  
York, NY 11439, USA

<sup>§</sup>Key Laboratory of Structure-Based Drug Design & Discovery of Ministry of Education and School of  
Traditional Chinese Materia Medica, Shenyang Pharmaceutical University, 103 Wen Hua Road,  
Shenyang 110016, China

<sup>^</sup>Drug Screening Center, Nanjing Key Gen Biotech. Co. Ltd., Nanjing 210012, China

**Table of Contents:**

Abbreviations Used.

Experimental.

1. Chemistry
2. Characterization Data for Target Compounds
3. MTT assay in vitro.
4. Cell cycle study
5. Analysis of cellular apoptosis

Figure 1.

Table 1.

<sup>1</sup>H NMR and <sup>13</sup>C NMR Spectrum of Target Compounds.

References.

## Abbreviations Used:

EDCI: 1-Ethyl-3-(3-dimethylaminopropyl) carbodiimide hydrochloride

DMAP: 4-dimethylamino pyridine

TsOH: 4-methylbenzenesulfonic acid

Ac<sub>2</sub>O: Acetic anhydride

TEA: Triethylamine

DMP: 2,2-Dimethoxypropane

DCM: Dichloromethane.

THF: Tetrahydrofuran

(Boc)<sub>2</sub>O: Di-tert-butyl pyrocarbonate

SOCl<sub>2</sub>: Thionyl chloride

## Experimental:

### 1. Chemistry

All commercially available solvents and reagents were used without further purification. Flash column chromatography was carried out on 200-300 mesh silica gel. <sup>1</sup>H NMR and <sup>13</sup>C NMR spectra were recorded with a Bruker AV-300 spectrometer in the indicated solvents (TMS as internal standard); the values of the chemical shifts are expressed in  $\delta$  values (ppm) and the coupling constants ( $J$ ) in Hz. Mass spectra were obtained using FTMS-2000. The synthetic method and physicochemical data of compounds **2** and **5** were disclosed in our previous report<sup>[1]</sup>. The synthetic routes to the benzoic acid mustard, compound **7** and compound **8** were outlined in literature<sup>[2-5]</sup>. Melphalan and chlorambucil were purchased directly from Sigma-Aldrich.

### 2. Characterization Data for Target Compounds

*ent-1 $\alpha$ ,6 $\beta$ ,7 $\beta$ -trihydroxy- $\{14\beta$ -O-[N-(S)-2-(4-(bis(2-chloroethyl)amino)*

*phenylpropionic acid methylester)aminoacyl-propionyloxy}]-15-oxo-7,20-epoxy-16-kaurene (16a).*

Compound **1** (72 mg, 0.2 mmol) was mixed with melphalan acid **10** (83 mg, 0.2 mmol), EDCI and DMAP in 15 mL of dichloromethane and stirred at room temperature for 12 h. The mixture was poured into 15 mL of 10% HCl, and extracted with dichloromethane (10 mL × 3). The organic layer was combined, washed with water and saturated NaCl solution sequentially, dried over anhydrous Na<sub>2</sub>SO<sub>4</sub>, and concentrated *in vacuo*. The crude product was purified by column chromatography (MeOH/CH<sub>2</sub>Cl<sub>2</sub> 1:150 v/v) to give the 107mg (83%) **16a** as a white solid. <sup>1</sup>H NMR(CDCl<sub>3</sub>, 300 M Hz), δ (ppm): 6.97 (d, *J* = 7.5 Hz, 2H, Ar-H), 6.63 (d, *J* = 7.5 Hz, 2H, Ar-H), 6.17 (m, 3H), 5.92 (s, 1H), 5.52 (s, 1H), 4.80 (d, *J* = 6.0 Hz, 1H), 4.30, 4.11 (dd, *J*<sub>A</sub> = *J*<sub>B</sub> = 9.0 Hz, each 1H, 20-CH<sub>2</sub>), 3.78 (s, 3H, -OCH<sub>3</sub>), 3.72 (m, 4H), 3.64 (m, 4H), 3.48 (m, 1H), 3.20 (m, 1H), 3.03 (m, 2H), 2.65 (m, 6H), 2.39 (m, 2H), 1.99 (m, 4H), 1.62 (m, 6H), 1.46 (s, 3H, -CH<sub>3</sub>), 1.21 (s, 3H, -CH<sub>3</sub>); <sup>13</sup>C NMR (CDCl<sub>3</sub>, 75 M Hz): δ (ppm) 206.9, 172.4, 171.5, 170.9, 150.2, 145.4, 130.8, 125.0, 120.5, 114.8, 112.4, 96.3, 76.2, 74.6, 73.7, 63.6, 62.0, 59.8, 54.9, 53.8, 53.6, 52.6, 41.6, 40.7, 38.9, 35.2, 33.1, 32.8, 30.8, 30.3, 30.0, 21.9, 20.1; ESI-MS *m/z* 765.3 [M+H]<sup>+</sup>; HR-MS (ESI, M+H) *m/z*: calcd for C<sub>38</sub>H<sub>51</sub>Cl<sub>2</sub>N<sub>2</sub>O<sub>10</sub>: 765.2915, found 765.2933.

*ent-1α,6β,7β-trihydroxy-{14β-O-[4-(p-bis(2-chloroethyl)aminophenyl)formyloxy]}-15-oxo-7,20-epoxy-16-kaurene (16b).*

According to the synthetic procedure from 0.2 mmol **1** to **16a** described above, **16b** (91 mg, 72%) was obtained as a white solid. <sup>1</sup>H NMR (CDCl<sub>3</sub>, 300 M Hz): δ (ppm) 7.78 (d, *J* = 9.0 Hz, 2H, Ar-H), 6.62 (d, *J* = 9.0 Hz, 2H, Ar-H), 6.17 (m, 2H), 6.03 (s, 1H), 5.47 (s, 1H), 4.30 (s, 1H), 4.08, 4.33 (dd, *J*<sub>A</sub> = *J*<sub>B</sub> = 10.2 Hz, each 1H), 3.78 (m, 4H), 3.65 (m, 4H), 3.57 (m, 1H), 3.28 (d, *J* = 9.6 Hz, 1H), 2.67 (m, 1H), 2.39

(m, 1H), 2.04 (m, 1H), 1.78 (m, 2H), 1.68 (m, 3H), 1.49 (m, 2H), 1.36 (m, 2H), 1.13 (s, 3H), 1.12 (s, 3H);  $^{13}\text{C}$  NMR ( $\text{CDCl}_3$ , 75 M Hz):  $\delta$  (ppm) 206.4, 164.3, 149.8, 149.6, 131.4, 119.6, 117.0, 110.6, 95.8, 76.2, 73.5, 72.6, 63.0, 61.5, 59.4, 54.1, 52.7, 41.0, 40.8, 39.6, 38.2, 33.2, 32.1, 30.0, 29.4, 21.1, 19.3; ESI-MS  $m/z$  608.2  $[\text{M}+\text{H}]^+$ ; HR-MS (ESI, M+H)  $m/z$ : calcd for  $\text{C}_{31}\text{H}_{40}\text{Cl}_2\text{NO}_7$ : 608.2176, found 608.2179; Anal. Calcd. For  $\text{C}_{31}\text{H}_{39}\text{Cl}_2\text{NO}_7$ ; C: 61.18; H: 6.46; N: 2.30, Found: C: 61.21; H: 6.43; N: 2.28.

*ent-1 $\alpha$ ,6 $\beta$ ,7 $\beta$ -trihydroxy- $\{14\beta$ -O-[4-(*p*-bis(2-chloroethyl)aminophenyl)butanoyloxy] $\}$ -15-oxo-7,20-epoxy-16-kaurene (16c).*

Compound **1** (72 mg, 0.2 mmol) was mixed with chlorambucil (60 mg, 0.2 mmol), EDCI and DMAP in 15 mL of dichloromethane and stirred at room temperature for 2 h. The mixture was poured into 15 mL of 10% HCl, and extracted with dichloromethane (10 mL  $\times$  3). The organic layer was combined, washed with water and saturated NaCl solution sequentially, dried over anhydrous  $\text{Na}_2\text{SO}_4$ , and concentrated *in vacuo*. The crude product was purified by column chromatography (MeOH/ $\text{CH}_2\text{Cl}_2$  1:120 v/v) to give 89 mg (71%) **16c** as a white solid.  $^1\text{H}$  NMR ( $\text{CDCl}_3$ , 300 M Hz),  $\delta$ (ppm): 6.92 (d,  $J = 8.4$  Hz, 2H, Ar-H), 6.53 (d,  $J = 8.4$  Hz, 2H, Ar-H), 6.07 (s, 1H), 6.06 (d,  $J = 6.0$  Hz, 1H), 5.75 (s, 1H), 5.41 (s, 1H), 4.25 (s, 1H), 4.23, 4.01 (dd,  $J_A = J_B = 10.2$  Hz, each 1H, 20- $\text{CH}_2$ ), 3.69 (m, 1H), 3.63 (m, 4H), 3.55 (m, 4H), 3.43 (m, 1H), 3.12 (d,  $J = 9.6$  Hz, 1H), 2.65 (m, 1H), 2.43 (t,  $J = 7.2$  Hz, 2H), 2.20 (t,  $J = 7.2$  Hz, 2H), 1.91 (m, 1H), 1.81 (m, 2H), 1.73 (m, 2H), 1.70 (m, 2H), 1.65 (m, 3H), 1.37 (m, 2H), 1.18 (s, 3H,  $-\text{CH}_3$ ), 1.05 (s, 3H,  $-\text{CH}_3$ );  $^{13}\text{C}$  NMR ( $\text{CDCl}_3$ , 75 M Hz):  $\delta$  (ppm) 206.1, 174.4, 149.4, 143.9, 129.6, 129.1, 119.6, 111.8, 95.7, 76.3, 73.4, 72.8, 63.0, 61.3, 59.3, 54.0, 53.1, 40.8, 40.7, 40.1, 38.2, 33.3, 33.2, 32.3, 30.0, 29.5, 29.2, 25.8, 21.1, 19.2; ESI-MS  $m/z$  650.3  $[\text{M}+\text{H}]^+$ ; HR-MS (ESI, M+H)  $m/z$ :

calcd for C<sub>34</sub>H<sub>46</sub>Cl<sub>2</sub>NO<sub>7</sub>: 650.2646, found 650.2652.

*ent-1 $\alpha$ ,6 $\beta$ ,7 $\beta$ -trihydroxy-{\14 $\beta$ -O-[N-(S)-2-(4-(bis(2-chloroethyl)amino)phenylpropionic acid methylester)aminoacyl-butyryloxy]}-15-oxo-7,20-epoxy-16-kaurene (16d).*

According to the synthetic procedure from 0.2 mmol **1** to **16a** described above, **16d** (102 mg, 78%) was obtained as a white solid. <sup>1</sup>H NMR(CDCl<sub>3</sub>, 300 M Hz),  $\delta$ (ppm): 6.98 (d,  $J$  = 7.8 Hz, 2H, Ar-H), 6.65 (d,  $J$  = 7.8 Hz, 2H, Ar-H), 6.5 (d,  $J$  = 6.6 Hz, 1H), 6.35 (d,  $J$  = 5.4 Hz, 1H), 6.20 (s, 1H), 5.90 (s, 1H), 5.52 (s, 1H), 4.80 (m, 1H), 4.30, 4.10 (dd,  $J_A = J_B = 9.0$  Hz, each 1H, 20-CH<sub>2</sub>), 3.77 (s, 3H, -OCH<sub>3</sub>), 3.72 (m, 4H), 3.64 (m, 4H), 3.50 (m, 1H), 3.20 (d,  $J$  = 6.0 Hz, 1H), 3.0 (m, 2H), 2.65 (m, 1H), 2.49 (m, 4H), 2.26 (m, 4H), 1.83 (m, 4H), 1.66 (m, 3H), 1.32 (m, 2H), 1.13 (s, 3H, -CH<sub>3</sub>), 1.12 (s, 3H, -CH<sub>3</sub>); <sup>13</sup>C NMR (CDCl<sub>3</sub>, 75 M Hz):  $\delta$  (ppm) 207.2, 177.9, 172.7, 172.4, 172.1, 150.3, 145.3, 130.8, 125.1, 120.6, 112.5, 96.3, 75.8, 74.4, 73.7, 63.6, 62.3, 59.6, 54.9, 53.8, 53.5, 52.6, 41.6, 40.7, 38.9, 37.0, 35.3, 33.8, 33.8, 33.1, 32.8, 31.1, 30.5, 22.0, 20.8, 20.1, 20.0; ESI-MS  $m/z$  779.3 [M+H]<sup>+</sup>; HR-MS (ESI, M+H)  $m/z$ : calcd for C<sub>39</sub>H<sub>53</sub>Cl<sub>2</sub>N<sub>2</sub>O<sub>10</sub>: 779.3072, found 779.3088.

*ent-1 $\alpha$ ,6 $\beta$ ,7 $\beta$ -trihydroxy-{\14 $\beta$ -O-[3-(4-(bis(2-chloroethyl)aminophenyl)-(S)-2-((tert-butoxycarbonyl)amino)propionyloxy]}-15-oxo-7,20-epoxy-16-kaurene (16e).*

According to the synthetic procedure from 0.2 mmol **1** to **16a** described above, **16e** (112 mg, 75%) was obtained as a white solid. <sup>1</sup>H NMR (CDCl<sub>3</sub>, 300 M Hz),  $\delta$  (ppm): 6.99 (d,  $J$  = 8.4 Hz, 2H, Ar-H), 6.57 (d,  $J$  = 8.4 Hz, 2H, Ar-H), 6.11 (m, 1H), 6.06 (d,  $J$  = 10.5 Hz, 1H), 5.88 (s, 1H), 5.45 (s, 1H), 4.93 (d,  $J$  = 7.2 Hz, 1H), 4.38 (m, 1H), 4.33, 4.07 (dd,  $J_A = J_B = 10.2$  Hz, each 1H, 20-CH<sub>2</sub>), 3.98 (br, 1H), 3.70 (m, 4H), 3.62 (m, 4H), 3.48 (m, 1H), 3.10 (m, 1H), 2.92 (m, 2H), 2.61 (m, 1H), 2.25 (m, 1H),

1.99 (m, 1H), 1.62 (m, 7H), 1.42 (m, 2H), 1.38 (s, 9H), 1.11 (s, 6H, -CH<sub>3</sub>); <sup>13</sup>C NMR (CDCl<sub>3</sub>, 75 M Hz): δ(ppm) 205.6, 170.4, 168.0, 149.3, 144.6, 130.2, 130.0, 124.2, 119.7, 111.7, 95.4, 74.0, 73.0, 62.8, 61.5, 59.0, 54.6, 54.3, 53.0, 40.8, 40.0, 38.2, 36.1, 33.2, 32.1, 30.1, 29.5, 27.7, 21.3, 19.4; ESI-MS *m/z* 751.3 [M+H]<sup>+</sup>; HR-MS (ESI, M+H) *m/z*: calcd for C<sub>38</sub>H<sub>53</sub>Cl<sub>2</sub>N<sub>2</sub>O<sub>9</sub>: 751.3123, found 751.3134.

*ent-1α,6β,7β-trihydroxy-{14β-O-[3-(4-(bis(2-chloroethyl)aminophenyl)-(S)-2-formamido-propionyloxy]}-15-oxo-7,20-epoxy-16-kaurene (16f).*

According to the synthetic procedure from 0.2 mmol **1** to **16a** described above, **16f** (78 mg, 60%) was obtained as a white solid. <sup>1</sup>H NMR (CDCl<sub>3</sub>, 300 M Hz), δ (ppm): 7.40 (s, 1H), 6.99 (d, *J* = 8.4 Hz, 2H, Ar-H), 6.55 (d, *J* = 8.4 Hz, 2H, Ar-H), 6.14 (m, 2H), 5.83 (s, 1H), 5.51 (s, 1H), 4.37 (m, 2H), 4.28, 4.09 (dd, *J*<sub>A</sub> = *J*<sub>B</sub> = 10.2 Hz, each 1H, 20-CH<sub>2</sub>), 3.80 (m, 1H), 3.69 (m, 4H), 3.63 (m, 4H), 3.50 (m, 1H), 3.20 (m, 1H), 2.63 (m, 2H), 2.26 (m, 1H), 2.12 (m, 2H), 2.06 (m, 3H), 1.65 (m, 3H), 1.28 (s, 3H), 1.12 (s, 6H, -CH<sub>3</sub>); <sup>13</sup>C NMR (DMSO-*d*<sub>6</sub>, 75 M Hz): δ (ppm) 209.1, 173.1, 161.6, 152.3, 145.4, 130.6, 130.5, 125.6, 119.9, 112.1, 97.3, 73.6, 72.9, 72.1, 63.2, 59.9, 53.5, 52.7, 52.6, 43.2, 41.6, 36.2, 33.8, 33.1, 30.4, 29.7, 22.1, 19.7; ESI-MS *m/z* 679.3 [M+H]<sup>+</sup>; HR-MS (ESI, M+H) *m/z*: calcd for C<sub>34</sub>H<sub>45</sub>Cl<sub>2</sub>N<sub>2</sub>O<sub>8</sub>: 679.2553, found 679.2546.

*ent-1α-O-Acetyl-6β,7β-dihydroxy-{14β-O-[N-(S)-2-(4-(bis(2-chloroethyl)amino)phenylpropionic acid methylester)aminoacyl-propionyloxy]}-15-oxo-7,20-epoxy-16-kaurene (17a).*

According to the synthetic procedure from **1** to **16a** described above, **17a** (132 mg, 82%) was obtained as a white solid from 0.2 mmol **5**. <sup>1</sup>H NMR (CDCl<sub>3</sub>, 300 M Hz): δ (ppm) 6.96 (d, *J* = 8.4 Hz, 2H, Ar-H), 6.69 (d, *J* = 8.4 Hz, 2H, Ar-H), 6.13 (m, 2H),

6.00 (d,  $J = 7.8$  Hz, 1H), 5.87 (s, 1H), 5.52 (s, 1H), 4.79 (m, 1H), 4.62 (m, 1H), 4.27, 4.17 (dd,  $J_A = J_B = 9.9$  Hz, each 1H, 20-CH<sub>2</sub>), 3.82 (m, 1H), 3.78 (s, 3H, -OCH<sub>3</sub>), 3.72 (m, 4H), 3.65 (m, 4H), 3.15 (d,  $J = 10.2$  Hz, 1H), 3.02 (m, 2H), 2.50 (m, 5H), 1.99 (m, 5H), 1.72 (m, 2H), 1.51 (m, 4H), 1.34 (m, 2H), 1.13 (s, 6H, -CH<sub>3</sub>); <sup>13</sup>C NMR (CDCl<sub>3</sub>, 75 M Hz):  $\delta$  (ppm) 205.8, 171.6, 170.8, 170.0, 169.4, 149.0, 144.7, 130.0, 124.1, 120.0, 111.6, 95.4, 75.3, 74.9, 73.7, 62.9, 61.1, 59.6, 53.2, 53.0, 52.8, 51.8, 40.6, 40.0, 39.2, 37.7, 36.1, 33.1, 31.9, 30.1, 29.7, 29.4, 24.7, 21.1, 21.0, 17.6; ESI-MS  $m/z$  807.3 [M+H]<sup>+</sup>; HR-MS (ESI, M+H)  $m/z$ : calcd for C<sub>40</sub>H<sub>53</sub>Cl<sub>2</sub>N<sub>2</sub>O<sub>11</sub>: 807.3021, found 807.3034.

*ent-1 $\alpha$ -O-Acetyl-6 $\beta$ ,7 $\beta$ -dihydroxy-{14 $\beta$ -O-[4-(*p*-bis(2-chloroethyl)aminophenyl)formyloxy]}-15-oxo-7,20-epoxy-16-kaurene (17b).*

According to the synthetic procedure from **1** to **16b** described above, **17b** (73 mg, 56%) was obtained as a white solid from 0.2 mmol **5**. <sup>1</sup>H NMR (CDCl<sub>3</sub>, 300 M Hz):  $\delta$  (ppm) 7.78 (d,  $J = 9.0$  Hz, 2H, Ar-H), 6.62 (d,  $J = 9.0$  Hz, 2H, Ar-H), 6.17 (m, 2H), 6.00 (s, 1H), 5.47 (s, 1H), 4.65 (m, 1H), 4.32 (s, 1H), 4.18, 4.33 (dd,  $J_A = J_B = 10.5$  Hz, each 1H), 3.79 (m, 4H), 3.65 (m, 4H), 3.29 (d,  $J = 10.2$  Hz, 1H), 2.61 (m, 1H), 2.09 (m, 1H), 2.05 (s, 3H), 1.78 (m, 1H), 1.58 (m, 3H), 1.49 (m, 2H), 1.36 (m, 3H), 1.14 (s, 3H), 1.12 (s, 3H); <sup>13</sup>C NMR (CDCl<sub>3</sub>, 75 M Hz):  $\delta$  (ppm) 205.9, 169.4, 164.2, 149.8, 149.2, 131.4, 119.8, 117.0, 110.6, 95.7, 75.9, 74.9, 73.3, 63.0, 61.1, 59.7, 53.2, 52.7, 40.7, 39.5, 39.3, 37.7, 33.1, 31.9, 29.7, 24.7, 21.0, 17.5; ESI-MS  $m/z$  650.2 [M+H]<sup>+</sup>; HR-MS (ESI, M+H)  $m/z$ : calcd for C<sub>33</sub>H<sub>42</sub>Cl<sub>2</sub>NO<sub>8</sub>: 650.2282, found 650.2298.

*ent-1 $\alpha$ -O-Acetyl-6 $\beta$ ,7 $\beta$ -dihydroxy-{14 $\beta$ -O-[4-(*p*-bis(2-chloroethyl)aminophenyl)butanoyloxy]}-15-oxo-7,20-epoxy-16-kaurene (17c).*

According to the synthetic procedure from **1** to **16c** described above, **17c** (87 mg,

62 %) was obtained as a white solid from 0.2 mmol **5**.  $^1\text{H}$  NMR ( $\text{CDCl}_3$ , 300 M Hz),  $\delta$  (ppm): 7.01 (d,  $J = 8.4$  Hz, 2H, Ar-H), 6.61 (d,  $J = 8.4$  Hz, 2H, Ar-H), 6.14 (s, 1H), 6.10 (d,  $J = 10.5$  Hz, 1H), 5.80 (s, 1H), 5.49 (s, 1H), 4.62 (m, 1H), 4.26 (m, 1H), 4.26, 4.18 (dd,  $J_A = J_B = 10.5$  Hz, each 1H, 20- $\text{CH}_2$ ), 3.81 (m, 1H), 3.78 (m, 4H), 3.61 (m, 4H), 3.18 (d,  $J = 9.9$  Hz, 1H), 2.60 (m, 1H), 2.50 (t,  $J = 7.2$  Hz, 2H), 2.28 (t,  $J = 7.2$  Hz, 2H), 2.03 (m, 2H), 1.97 (s, 3H), 1.91 (m, 4H), 1.55 (m, 5H), 1.12 (s, 6H);  $^{13}\text{C}$  NMR ( $\text{CDCl}_3$ , 75 M Hz):  $\delta$  (ppm) 205.7, 171.4, 169.4, 148.9, 143.9, 129.6, 129.2, 119.9, 111.8, 95.6, 76.0, 74.9, 73.2, 63.0, 60.9, 59.8, 53.1, 40.5, 40.0, 39.2, 37.6, 33.3, 33.2, 33.1, 31.9, 29.7, 29.2, 25.8, 24.7, 21.0, 17.4; ESI-MS  $m/z$  692.3  $[\text{M}+\text{H}]^+$ ; HR-MS (ESI, M+H)  $m/z$ : calcd for  $\text{C}_{36}\text{H}_{48}\text{Cl}_2\text{NO}_8$ : 692.2751, found 692.2761.

*ent-6 $\beta$ ,7 $\beta$ -dihydroxy- $\{14\beta\text{-O-[N-(S)-2-(4-(bis(2-chloroethyl)amino)phenylpropionic acid methylester)aminoacyl-propionyloxy]\}$ -1,15-dioxo-7,20-epoxy-16-kaurene (**18a**).*

According to the synthetic procedure from **1** to **16a** described above, **18a** (119 mg, 78%) was obtained as a white solid from 0.2 mmol **2**.  $^1\text{H}$  NMR ( $\text{CDCl}_3$ , 300 M Hz):  $\delta$  (ppm) 6.95 (d,  $J = 8.7$  Hz, 2H, Ar-H), 6.63 (d,  $J = 8.7$  Hz, 2H, Ar-H), 6.24 (s, 1H), 6.04 (d,  $J = 7.8$  Hz, 1H), 5.92 (s, 1H), 5.62 (s, 1H), 5.40 (br, 1H), 4.79 (m, 1H), 4.29, 4.01 (dd,  $J_A = J_B = 9.0$  Hz, each 1H, 20- $\text{CH}_2$ ), 3.74 (s, 3H,  $-\text{OCH}_3$ ), 3.70 (m, 4H), 3.66 (m, 4H), 3.10 (m, 1H), 3.03 (m, 1H), 2.50 (m, 6H), 2.39 (m, 2H), 1.99 (m, 4H), 1.62 (m, 5H), 1.19 (s, 3H,  $-\text{CH}_3$ ), 0.99 (s, 3H,  $-\text{CH}_3$ );  $^{13}\text{C}$  NMR ( $\text{CDCl}_3$ , 75 M Hz):  $\delta$  (ppm) 211.2, 204.4, 173.1, 171.2, 148.8, 144.4, 130.1, 121.5, 111.6, 96.5, 73.9, 72.9, 64.3, 59.3, 53.0, 52.8, 51.8, 50.2, 48.1, 40.9, 40.0, 37.9, 36.1, 35.3, 32.4, 30.2, 30.0, 29.5, 29.2, 22.7, 18.7; ESI-MS  $m/z$  763.3  $[\text{M}+\text{H}]^+$ ; HR-MS (ESI, M+H)  $m/z$ : calcd for  $\text{C}_{38}\text{H}_{49}\text{Cl}_2\text{N}_2\text{O}_{10}$ : 763.2759, found 763.2754.

*ent-6 $\beta$ ,7 $\beta$ -dihydroxy- $\{14\beta\text{-O-[4-(p-bis(2-chloroethyl)aminophenyl)formyloxy]\}$ -1,15-*



*dioxo-7,20-epoxy-16-kaurene (18b).*

According to the synthetic procedure from **1** to **16a** described above, **18b** (89 mg, 74%) was obtained as a white solid from 0.2 mmol **2**. <sup>1</sup>H NMR (CDCl<sub>3</sub>, 300 M Hz): δ (ppm) 7.79 (d, *J* = 9.0 Hz, 2H, Ar-H), 6.63 (d, *J* = 9.0 Hz, 2H, Ar-H), 6.27 (s, 1H), 6.00 (s, 1H), 5.59 (s, 1H), 5.45 (d, *J* = 11.4 Hz, 1H), 4.35 (m, 1H), 4.03, 4.33 (dd, *J*<sub>A</sub> = *J*<sub>B</sub> = 10.2 Hz, each 1H), 3.78 (m, 5H), 3.63 (m, 4H), 3.27 (d, *J* = 9.6 Hz, 1H), 2.67 (m, 1H), 2.41 (m, 3H), 2.04 (m, 3H), 1.80 (m, 1H), 1.71 (m, 1H), 1.36 (m, 1H), 1.21 (s, 3H), 1.01 (s, 3H); <sup>13</sup>C NMR (CDCl<sub>3</sub>, 75 M Hz): δ (ppm) 211.3, 204.5, 165.9, 149.7, 149.1, 131.5, 121.5, 116.4, 110.6, 96.6, 76.1, 74.8, 72.6, 64.4, 60.8, 59.8, 52.8, 50.2, 48.1, 41.0, 39.5, 38.1, 35.3, 32.4, 30.0, 29.5, 22.8, 18.6; ESI-MS *m/z* 606.2 [M+H]<sup>+</sup> HR-MS (ESI, M+H) *m/z*: calcd for C<sub>31</sub>H<sub>38</sub>Cl<sub>2</sub>NO<sub>7</sub>: 606.2022, found 606.2021.

*ent-6β,7β-dihydroxy-{14β-O-[4-(p-bis(2-chloroethyl)aminophenyl)butanoyloxy]}*  
*-1,15-dioxo-7,20-epoxy-16-kaurene (18c).*

According to the synthetic procedure from **1** to **16a** described above, **18c** (92 mg, 72%) was obtained as a white solid from 0.2 mmol **2**. <sup>1</sup>H NMR(CDCl<sub>3</sub>, 300 M Hz), δ (ppm): 7.01 (d, *J* = 8.7 Hz, 2H, Ar-H), 6.60 (d, *J* = 8.7 Hz, 2H, Ar-H), 6.25 (s, 1H), 5.85 (s, 1H), 5.60 (s, 1H), 5.40 (d, *J* = 11.7 Hz, 1H), 4.22 (s, 1H), 4.29, 4.03 (dd, *J*<sub>A</sub> = *J*<sub>B</sub> = 10.2 Hz, each 1H, 20-CH<sub>2</sub>), 3.72 (m, 1H), 3.71 (m, 4H), 3.60 (m, 4H), 3.13 (d, *J* = 9.3 Hz, 1H), 2.60 (m, 1H), 2.50 (t, *J* = 7.2 Hz, 2H), 2.35 (m, 2H), 2.26 (t, *J* = 7.2 Hz, 2H), 1.96 (m, 2H), 1.84 (m, 2H), 1.73 (m, 2H), 1.68 (m, 1H), 1.25 (m, 2H), 1.19 (s, 3H, -CH<sub>3</sub>), 1.00 (s, 3H, -CH<sub>3</sub>); <sup>13</sup>C NMR (CDCl<sub>3</sub>, 75 M Hz): δ (ppm) 211.1, 204.4, 171.4, 148.9, 143.9, 129.8, 129.3, 129.2, 121.5, 111.8, 96.5, 74.5, 72.6, 64.4, 60.7, 59.6, 53.1, 50.2, 48.0, 40.9, 40.0, 38.0, 35.3, 33.3, 32.4, 30.0, 29.5, 25.8, 22.7, 18.6; ESI-MS *m/z* 648.3 [M+H]<sup>+</sup>; HR-MS (ESI, M+H) *m/z*: calcd for C<sub>34</sub>H<sub>44</sub>Cl<sub>2</sub>NO<sub>7</sub>: 648.2489, found 648.2496.

### **3. MTT assay *in vitro***

The MTT assay was performed in 96-well plates. K562 cells (CaEs-17, Bel-7402 and MGC-803 cells, L-O2, SW620, SW620/AD300, NCI-H460, NCI-H460/MX20) at the log phase of their growth cycle ( $5 \times 10^4$  cells/mL) were added to each well (100  $\mu$ L/well), then treated in the presence or absence of test compounds, and incubated for 24 h at 37 °C in a humidified atmosphere of 5 % CO<sub>2</sub>. After 72 h, 20  $\mu$ L of MTT solution (5 mg/mL) per well was added to each cultured medium, which was incubated for another 4 h. Then, DMSO was added to each well (150  $\mu$ L/well). After 10 min at room temperature, the OD of each well was measured on a Microplate Reader (BIO-RAD Instruments Inc NO.550) at the wavelength of 490 nm. In these experiments, the negative reference agent was 0.1 % DMSO, and Taxol was used as the positive reference with the concentration of 10  $\mu$ g/mL.

### **4. Cell cycle study**

Progression through the cell cycle was assessed by flow cytometry DNA determination with propidium iodide (PI). Bel-7402 cells were planted in 6-well plates ( $5.0 \times 10^3$  cells/well) and incubated at 37°C for 24 h. Cells were incubated with tested compound at certain concentrations. Cells treated with the solvent (DMSO) were included. After 48 h treatment, cells were fixed with 70% ethanol, treated with RNase, and stained with PI. Cellular DNA content for the cell cycle distribution analysis, was measured using a flow cytometer (FACS Calibur Becton-Dickinson).

### **5. Analysis of cellular apoptosis**

This assay was applied to determine the capacity of inducing cell death of the

compounds under investigation. The Bel-7402 cells were incubated with the compounds as described above. Cells were then exposed to tested compound for 48 h and apoptosis was analyzed using Annexin V and propidium iodide double staining by flow cytometry according to the manufacturer's instructions in order to detect apoptotic cells. Three cell populations, including viable (annexin V-FITC, negative; PI, negative), early apoptotic (annexin V-FITC, positive; PI, negative), and late apoptotic cells or dead cells (annexin V-FITC, positive; PI, positive), were utilized.

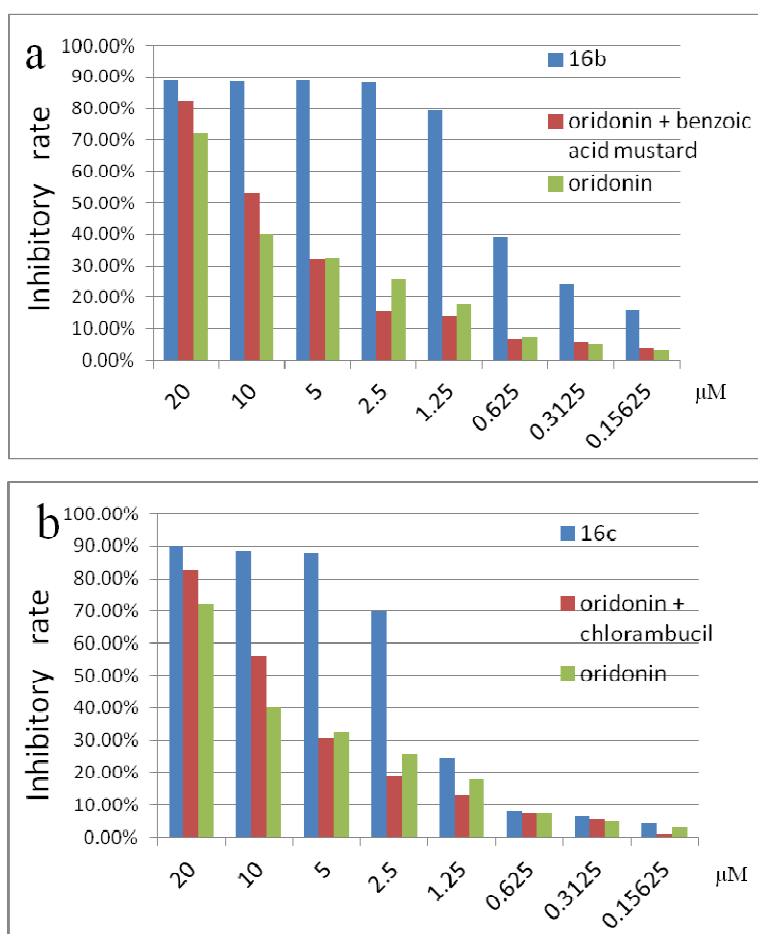

**Figure 1.** (a) Inhibitory rate of the conjugate (**16b**), oridonin and oridonin + benzoic acid mustard against the MCF-7 cells; (b) Inhibitory rate of the conjugate (**16c**), oridonin and oridonin + chlorambucil against the MCF-7 cells.

**Table 1.** The influence of cell cycle progression in Bel-7402 cells by compound **16b** at different concentrations

| Group               |               | G <sub>1</sub> (%) | S(%)  | G <sub>2</sub> (%) |
|---------------------|---------------|--------------------|-------|--------------------|
| Negative control    |               | 39.66              | 40.82 | 19.52              |
| Compound <b>16b</b> | 0.125 $\mu$ M | 45.65              | 41.33 | 13.02              |
|                     | 0.25 $\mu$ M  | 45.25              | 44.77 | 9.98               |
|                     | 0.5 $\mu$ M   | 51.98              | 43.56 | 4.46               |

**<sup>1</sup>H NMR and <sup>13</sup>C NMR Spectrum of Target Compounds.**

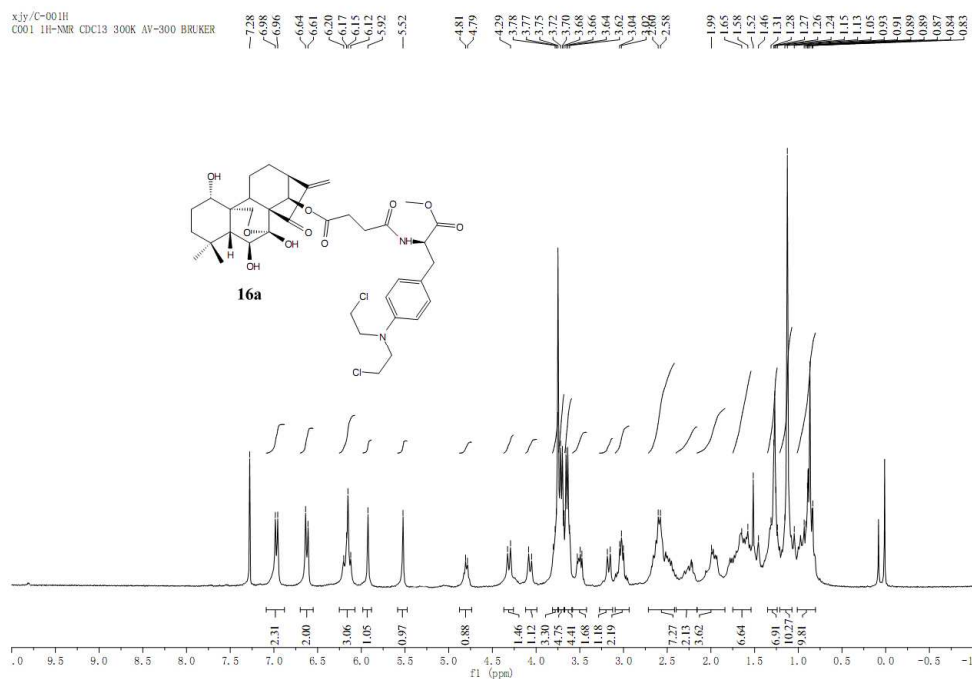

xjy/C-001C  
 C001 13C-NMR CDCl3 300K AV-300 BRUKER

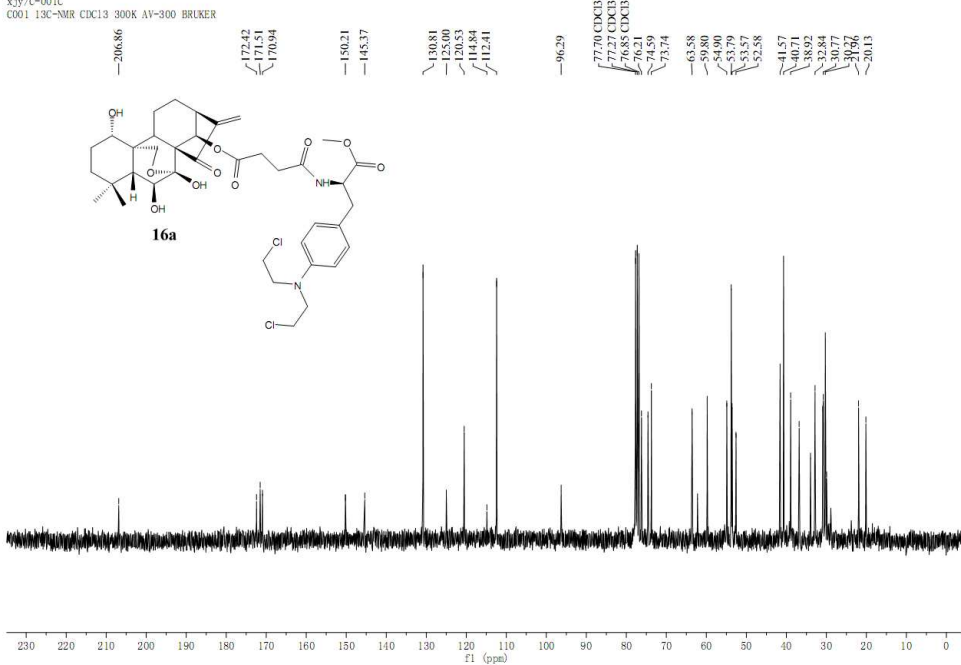

XST-C013 CDCL3 1HNMR AV300

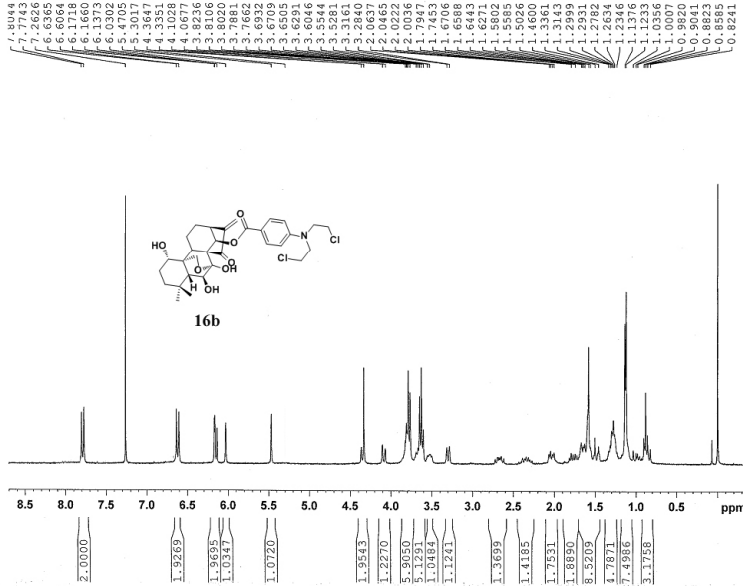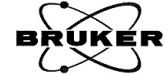

NAME XST-C013  
 EXPNO 1  
 F2AQNO 1  
 Date\_ 20130312  
 Time 9.26  
 INSTRUM spect  
 PROBHD 5 mm PABBO 13C  
 PULPROG zgpg30  
 TD 32768  
 SOLVENT CDCl3  
 NS 16  
 DS 4  
 SWH 4807.692 Hz  
 FIDRES 0.146719 Hz  
 AQ 3.1078220 sec  
 RG 256  
 DW 104.000 usec  
 DE 7.00 usec  
 TE 300.0 K  
 D1 1.0000000 sec  
 TD0 1

----- CHANNEL f1 -----  
 NUC1 13  
 P1 13.70 usec  
 PL1 -1.00 dB  
 FWHM 12.3646057 Hz  
 SF01 300.1322510 MHz  
 SFO1 300.1322510 MHz  
 SF 300.1300052 MHz  
 WDW 0  
 SSB 0  
 LA 0.00 Hz  
 GB 0  
 FC 0.90

XST-C013 C13-NMR CDC13 303K AV-300

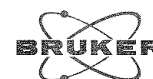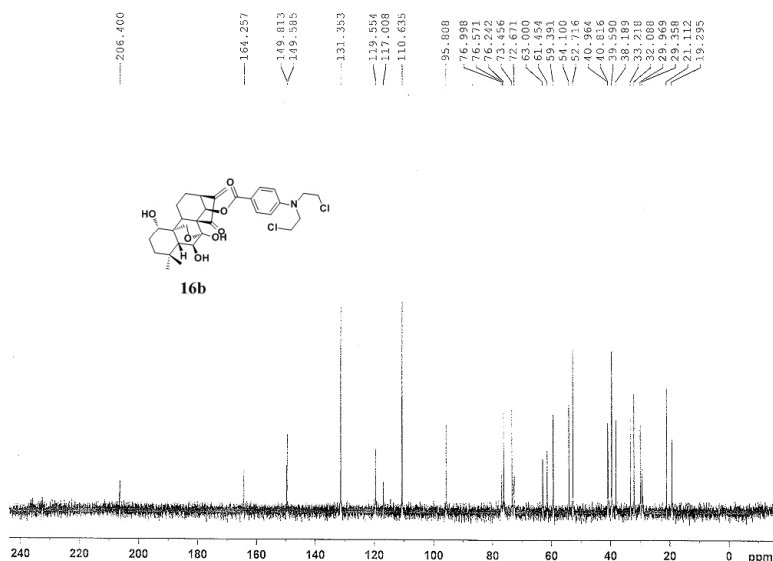

NAME C013  
EXPNO 1  
PROCNO 1  
Date\_ 20130830  
Time 10.40  
INSTRUM spect  
PROBHD 5 mm PADCL 13C  
PULPROG zgpg30  
TD 65536  
SOLVENT CDCl3  
NS 4  
DS 4  
SWH 19531.250 Hz  
FIDRES 0.238023 Hz  
AQ 1.677716 sec  
RG 50.8  
DM 28.600 usec  
DE 7.00 usec  
TE 300.0 K  
D1 2.0000000 sec  
D11 0.4900000 sec  
TDO 1

----- CHANNEL f1 -----  
NUC1 13C  
P1 13.00 usec  
PL1 1.00 dB  
PL1W 26.73651303 W  
SFO1 75.4764278 MHz

----- CHANNEL f2 -----  
CPDPRG2 waltz16  
NUC2 1H  
PCPD2 80.00 usec  
PL2 -1.00 dB  
PL2W 12.36450577 W  
PL12W 0.36490241 W  
SFO2 300.1312003 MHz  
SI 32768  
SF 75.4677867 MHz  
WDW EM  
SSB 0  
LB 1.00 Hz  
GB 0  
PC 1.40

XST-C009 CDCL3 1HNMR AV300

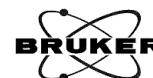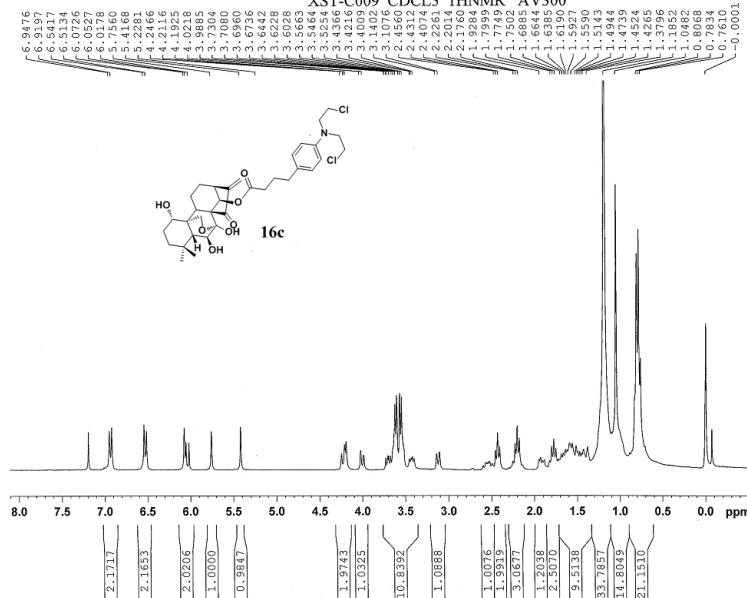

NAME XST-C009  
EXPNO 1  
PROCNO 1  
Date\_ 20130828  
Time 13.55  
INSTRUM spect  
PROBHD 5 mm PADCL 13C  
PULPROG zgpg30  
TD 32768  
SOLVENT CDCl3  
NS 4  
DS 4  
SWH 4807.682 Hz  
FIDRES 0.146719 Hz  
AQ 3.4019220 sec  
RG 256  
DM 104.000 usec  
DE 7.00 usec  
TE 300.0 K  
D1 1.0000000 sec  
TDO 1

----- CHANNEL f1 -----  
NUC1 1H  
P1 13.00 usec  
PL1 -1.00 dB  
PL1W 12.36450577 W  
SFO1 300.1322510 MHz  
SI 32768  
SF 300.1300003 MHz  
WDW EM  
SSB 0  
LB 0.00 Hz  
GB 0  
PC 0.90

XST-C009 C13-NMR DMSO 303K AV-300

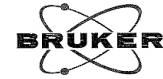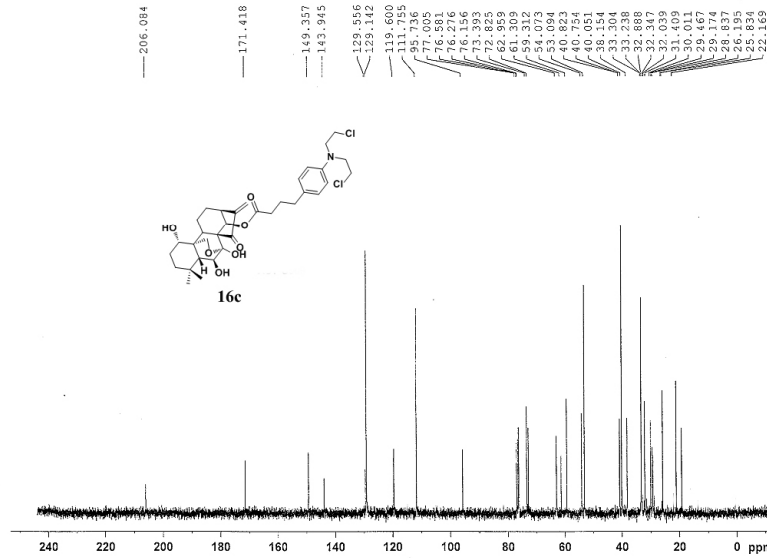

xjy/C-002H  
C002 1H-NMR CDCl3 300K AV-300 BRUKER

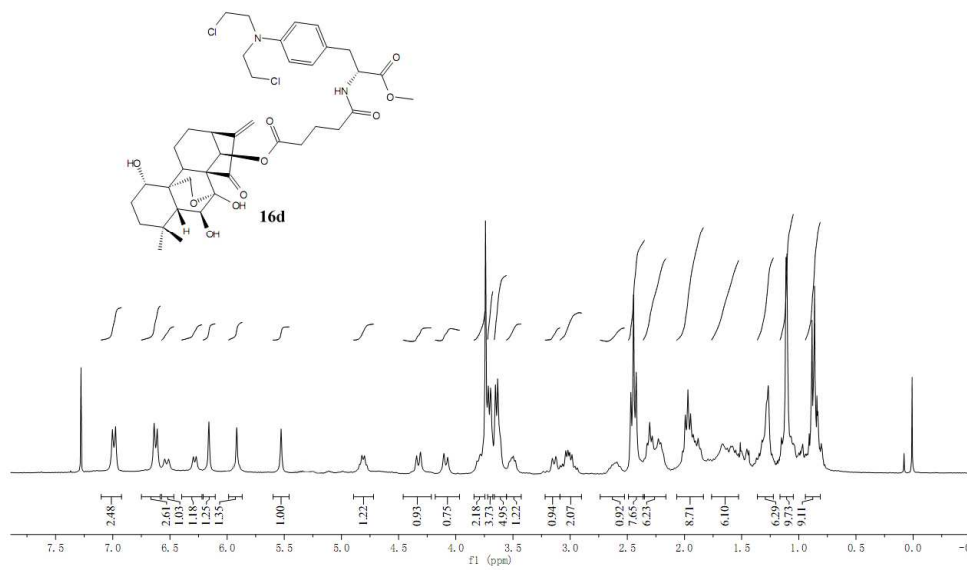

xjy/C-002C  
 C002 13C-NMR CDCL3 300K AV-300 BRUKER

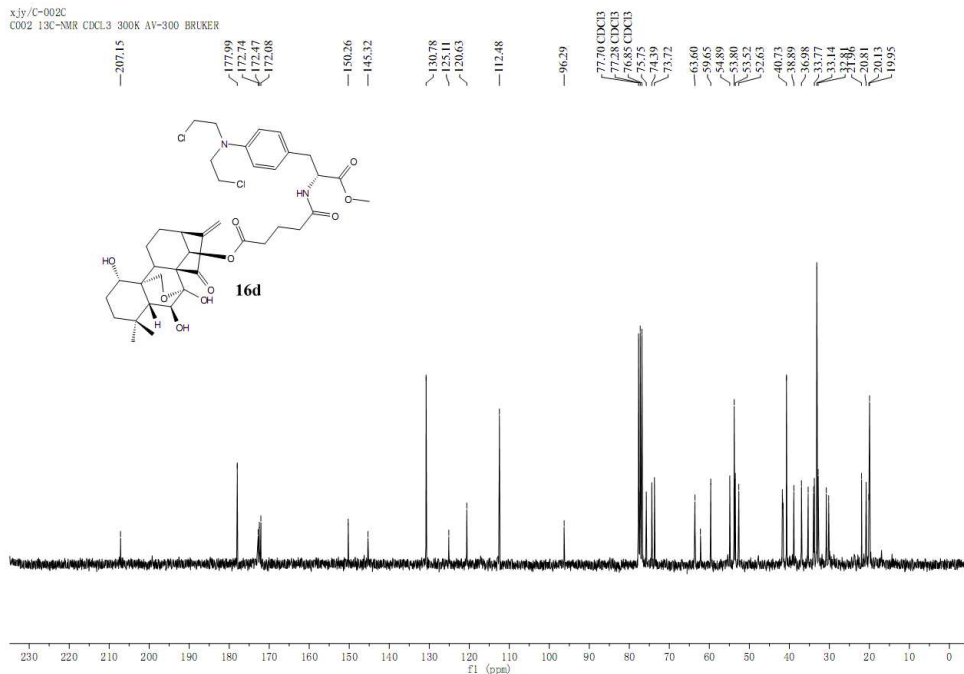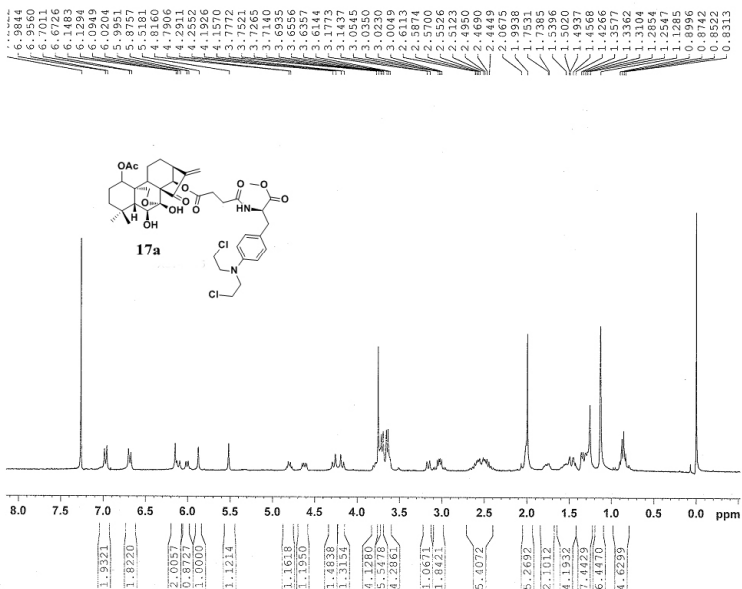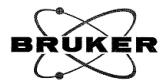

```

NAME      XST-0035 5x
EXPNO    1
PROCNO   1
Date_    20130409
Time     14:22
INSTRUM  spect
PROBHD   5 mm PABU1 13C
PULPROG  zgpg30
TE       303.2K
SOLVENT  CDCL3
NS       16
DS       1
SFO      7711.658 Hz
FIDRES   0.220079 Hz
AQ       2.213564 sec
RG       287
SM       69.323 cscs
DE       7.00 usec
TE       300.2 K
D1       1.00000000 sec
TD0      1

===== CHANNEL f1 =====
NUC1     1H
PC       13.70 usec
PL1     -1.00 dB
PL12    15.8460077 dB
PL13    100.1331014 MHz
RF01     300.1330053 MHz
SF       300.1330053 MHz
WDW      no
SSB      0
LB       0.00 Hz
GB       0
PC       0.90
  
```



XST-C035A C13-NMR DMSO 303K AV-300

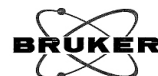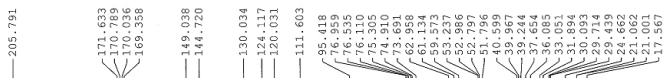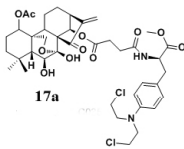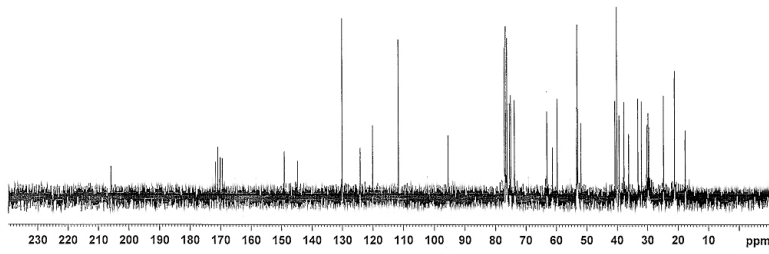

```

NAME XST-C035A 50
EXPNO 1
PROCNO 1
Date_ 20130909
Time 11.45
INSTRUM spect
PROBHD 5 mm PABUL 13C
PULPROG zgdc
TD 65536
SOLVENT CDCl3
NS 160
DS 4
SWH 19531.250 Hz
FIDRES 0.298023 Hz
AQ 1.6777716 sec
RG 50.8
DW 25.600 usec
DE 7.00 usec
TE 300.0 K
D1 2.00000000 sec
D11 0.03000000 sec
TDO 1
===== CHANNEL f1 =====
NUC1 13C
P1 11.80 usec
PL1 1.00 dB
PL1W 26.73651505 W
SFO1 75.4764278 MHz
===== CHANNEL f2 =====
CPDPRG2 waltz16
NUC2 1H
PCPD2 80.00 usec
PL2 -1.00 dB
PL12 14.30 dB
PL2W 12.36450577 W
PL12W 0.36490241 W
SFO2 300.1312005 MHz
SI 32768
SF 75.4677867 MHz
WDW EM
SSB 0
LB 1.00 Hz
GB 0
PC 1.40
    
```

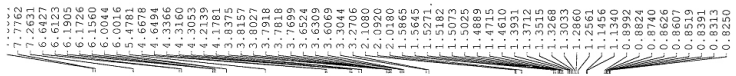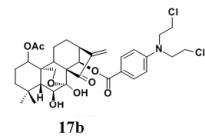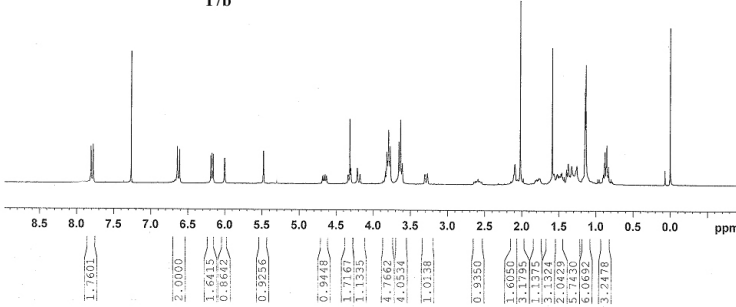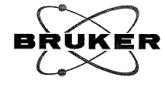

```

NAME XST-C033 50
EXPNO 1
PROCNO 1
Date_ 20130409
Time 16.22
INSTRUM spect
PROBHD 5 mm PABUL 13C
PULPROG zgpg30
TD 65536
SOLVENT CDCl3
NS 16
DS 1
SWH 7211.539 Hz
FIDRES 0.220795 Hz
AQ 2.2719646 sec
RG 287
DW 69.333 usec
DE 7.00 usec
TE 300.0 K
D1 1.00000000 sec
TDO 1
===== CHANNEL f1 =====
NUC1 1H
P1 12.70 usec
PL1 -1.00 dB
PL1W 12.36450577 W
SFO1 300.1312005 MHz
SI 32768
SF 300.1300049 MHz
WDW EM
SSB 0
LB 0.00 Hz
GB 0
PC 0.90
    
```

XST-C033 C13-NMR DMSO 303K AV-300

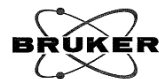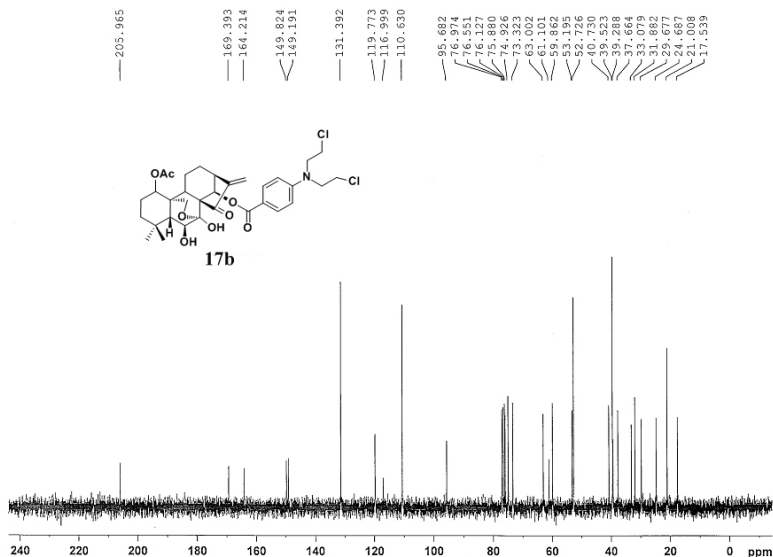

XST-C034 CDCL3 1HNMR AV300

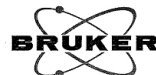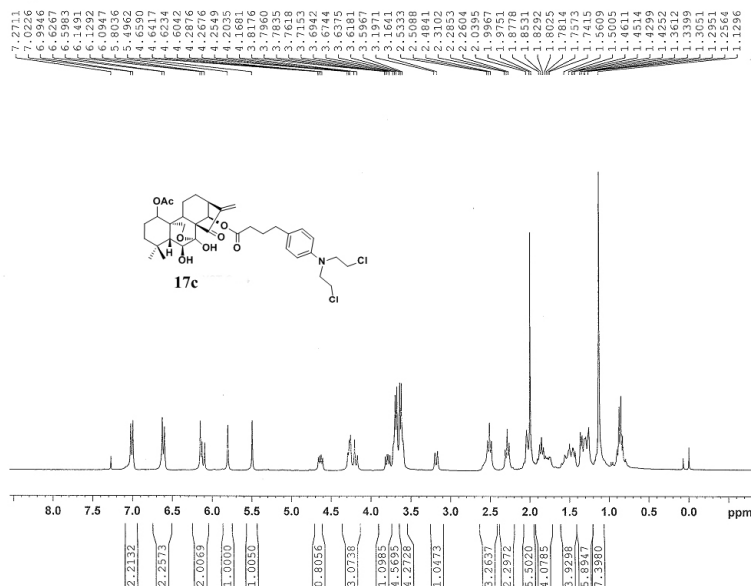

XST-C034 C13-NMR CDC13 303K AV-300

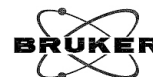

205.678  
171.390  
169.351  
146.911  
143.886  
129.592  
129.153  
119.930  
111.828  
95.614  
77.001  
76.577  
75.999  
74.862  
73.223  
73.223  
60.941  
59.756  
53.128  
40.596  
39.240  
37.628  
33.281  
33.073  
31.851  
29.710  
29.183  
24.675  
21.007  
17.436

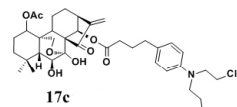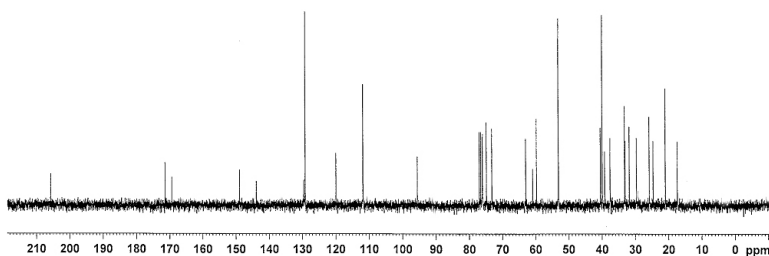

```

NAME XST-C034
EXPNO 1
PROCNO 1
Date_ 20130702
Time 9.28
INSTRUM spect
PROBHD 5 mm PADUL 13C
PULPROG zgpg
TD 65536
SOLVENT CDCl3
NS 48
DS 2
SWH 19531.250 Hz
FIDRES 0.298023 Hz
AQ 1.6777716 sec
RG 64
DM 25.600 usec
DE 7.00 usec
TE 300.0 K
D1 2.00000000 sec
d11 0.32000000 sec
TDO 1

===== CHANNEL f1 =====
NUC1 13C
P1 11.80 usec
PL1 1.00 dB
PL1W 26.73651503 W
SF01 75.4764278 MHz

===== CHANNEL f2 =====
CPDPRG2 waltz16
NUC2 13
PCPD2 80.00 usec
PL2 -1.00 dB
PL12 14.30 dB
PL1W 12.36450377 W
SF12W 0.36490241 W
SF02 300.1310000 MHz
S1 32768
SF 75.4677867 MHz
W0W 0
SSB 0
LB 1.00 Hz
GB 0
PC 1.40
    
```

XST-C023 CDCL3 1HNMR AV300

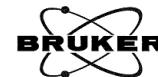

6.2706  
6.2477  
6.2477  
6.6187  
6.2453  
5.8278  
4.9366  
4.2715  
4.0366  
3.7437  
3.7053  
3.6885  
3.6276  
3.1293  
3.0993  
3.0359  
2.9989  
2.5693  
2.5454  
2.5444  
2.5172  
2.5028  
2.4917  
2.4256  
2.4271  
2.4271  
2.4403  
2.3722  
2.3566  
2.3424  
2.2756  
2.2756  
1.9611  
1.9327  
1.9101  
1.8742  
1.8588  
1.7658  
1.7421  
1.7421  
1.7028  
1.6965  
1.6695  
1.6695  
1.5983  
1.5551  
1.5396  
0.9711  
0.8519

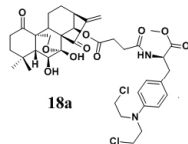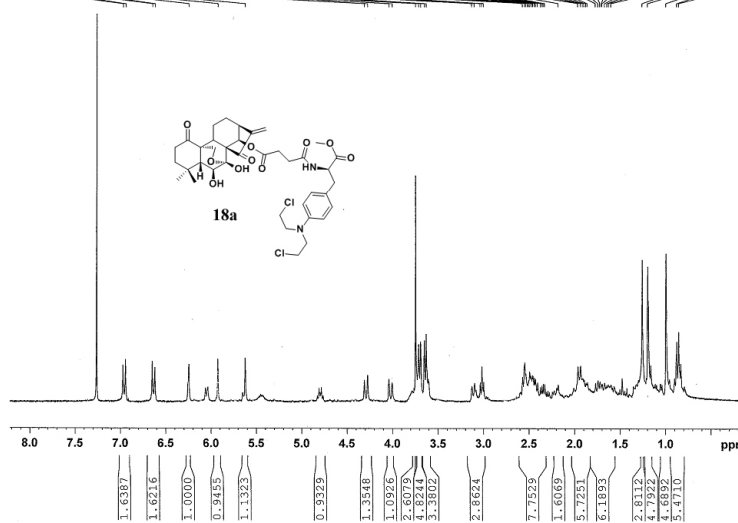

```

NAME XST-C023
EXPNO 1
PROCNO 1
Date_ 20130329
Time 9.15
INSTRUM spect
PROBHD 5 mm PADUL 13C
PULPROG zgpg
TD 65536
SOLVENT CDCl3
NS 16
DS 1
SWH 7211.539 Hz
FIDRES 0.220078 Hz
AQ 2.2719646 sec
RG 303
DM 69.333 usec
DE 7.00 usec
TE 300.0 K
D1 1.00000000 sec
TDO 1

===== CHANNEL f1 =====
NUC1 1H
P1 13.70 usec
PL1 -1.00 dB
PL1W 12.36450377 W
SF01 300.131014 MHz
S1 32768
SF 300.1300000 MHz
W0W 0
SSB 0
LB 0.00 Hz
GB 0
PC 0.90
    
```

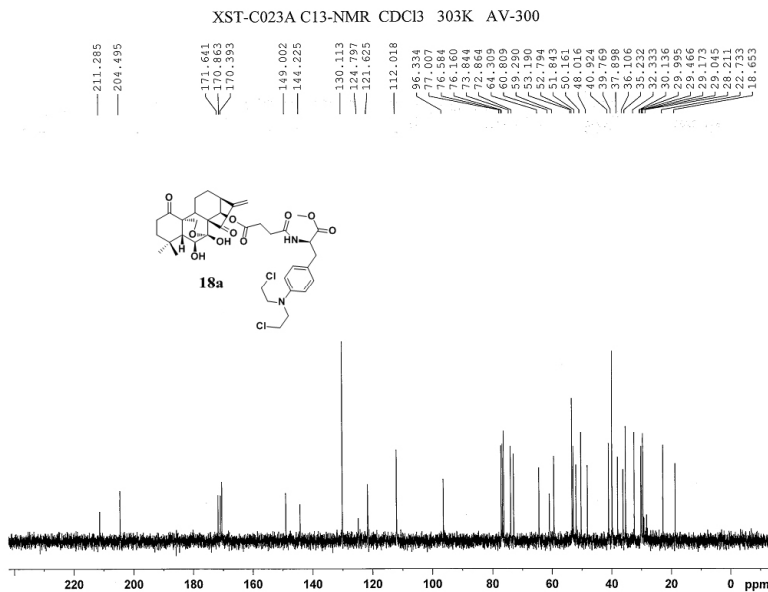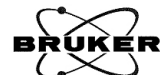

```

NAME      XST-C023A
EXPNO    1
PROCNO   1
Date_    20131128
Time     10.03
INSTRUM  spect
PROBHD   5 mm PABUL 13C
PULPROG  zgpg
TD        65536
SOLVENT  CDCl3
NS        86
DS        4
SWH       19531.250 Hz
FIDRES    0.298023 Hz
AQ        1.6777716 sec
RG         50.8
DM        25.600 usec
DE        7.00 usec
TE        300.0 K
D1        2.00000000 sec
D11       0.03000000 sec
TDO

===== CHANNEL f1 =====
NUC1      13C
P1        11.80 usec
PL1       -1.00 dB
PL12      26.73651505 W
SFO1      75.4764278 MHz

===== CHANNEL f2 =====
CPDPRG2   waltz16
NUC2       1H
PCPD2     80.00 usec
PZ2       -1.00 dB
PL12      14.30 dB
PL2M      12.36450577 W
PL12M     0.36490243 W
SFO2      300.1312005 MHz
SI         32768
SF        75.4677967 MHz
WDW       EM
SSB       0
LB        1.00 Hz
GB         0
PC        1.40
  
```

XST-C021 CDCl3 1HNMR AV300

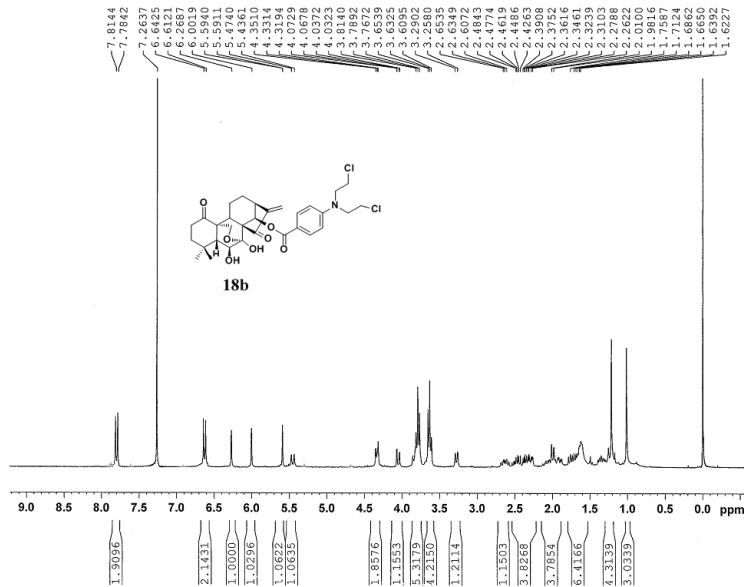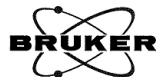

```

NAME      XST-C021
EXPNO    1
PROCNO   1
Date_    20130325
Time     9.04
INSTRUM  spect
PROBHD   5 mm PABUL 13C
PULPROG  zgpg
TD        32768
SOLVENT  CDCl3
NS        16
DS        4
SWH       7011.539 Hz
FIDRES    0.220975 Hz
AQ        2.2719666 sec
RG         281
DM        69.333 usec
DE        7.00 usec
TE        300.0 K
D1        1.00000000 sec
TDO

===== CHANNEL f1 =====
NUC1      1H
P1        13.70 usec
PL1       -1.00 dB
PL12      12.36450577 W
SFO1      300.1313154 MHz
SI         32768
SF        300.1306048 MHz
WDW       EM
SSB       0
LB        0.00 Hz
GB         0
PC        0.90
  
```

XST-C021 C13-NMR DMSO 303K AV-300

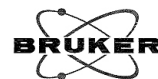

211.283  
204.549  
149.702  
149.059  
131.458  
121.479  
110.557  
96.627  
76.963  
76.540  
76.317  
75.845  
64.418  
60.803  
57.748  
50.247  
48.106  
40.979  
39.081  
35.316  
32.387  
30.487  
22.777  
18.621

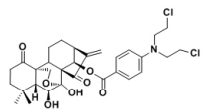

18b

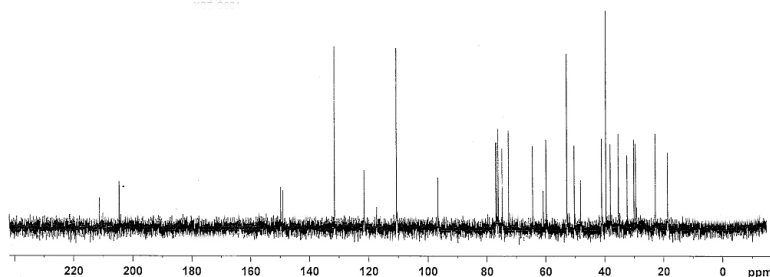

```

NAME XST-C021
EXPNO 1
PROCNO 1
Date_ 20130703
Time 13.01
INSTRUM spect
PROBHD 5 mm PABUL 13C
PULPROG zgpg30
SOLVENT DMSO
NS 105
DS 4
SWH 19531.250 Hz
FIDRES 0.298023 Hz
AQ 1.6777716 sec
RG 57
DM 25.600 usec
DE 1.00 usec
TE 300.0 K
D1 2.0000000 sec
D11 0.0300000 sec
TDO 1
    
```

```

===== CHANNEL f1 =====
NUC1 13C
P1 11.80 usec
PL1 -1.00 dB
PL12 14.30 dB
PL1W 26.73651503 W
SFO1 75.4764278 MHz
    
```

```

===== CHANNEL f2 =====
CPDPRG2 waltz16
NUC2 1H
PCPD2 80.00 usec
PL2 -1.00 dB
PL12 14.30 dB
PL2W 12.36450577 W
PL12W 0.36490241 W
SFO2 300.1313005 MHz
SI 32768
SF 75.4677867 MHz
WDW EM
SSB 0
LB 1.00 Hz
GB 0
PC 1.40
    
```

XST-C022 CDCL3 1HNMR AV300

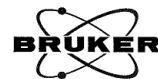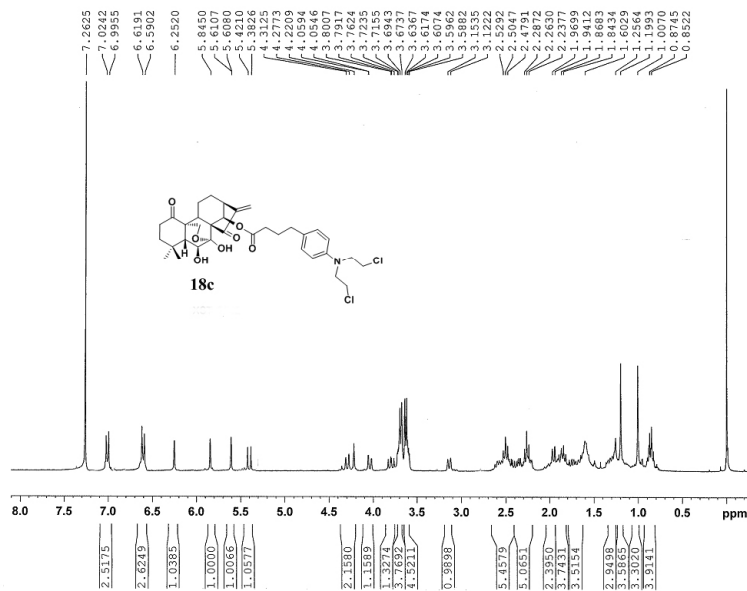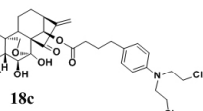

18c

```

NAME XST-C022
EXPNO 1
PROCNO 1
Date_ 20130329
Time 9.09
INSTRUM spect
PROBHD 5 mm PABUL 13C
PULPROG zgpg30
SOLVENT CDCl3
NS 16
DS 1
SWH 7211.539 Hz
FIDRES 0.220079 Hz
AQ 2.2719666 sec
RG 303
DM 69.333 usec
DE 1.00 usec
TE 300.0 K
D1 1.0000000 sec
TDO 1
    
```

```

===== CHANNEL f1 =====
NUC1 1H
P1 13.70 usec
PL1 -1.00 dB
PL1W 12.36450577 W
SFO1 300.1313154 MHz
SI 32768
SF 300.1300052 MHz
WDW EM
SSB 0
LB 0.00 Hz
GB 0
PC 0.90
    
```

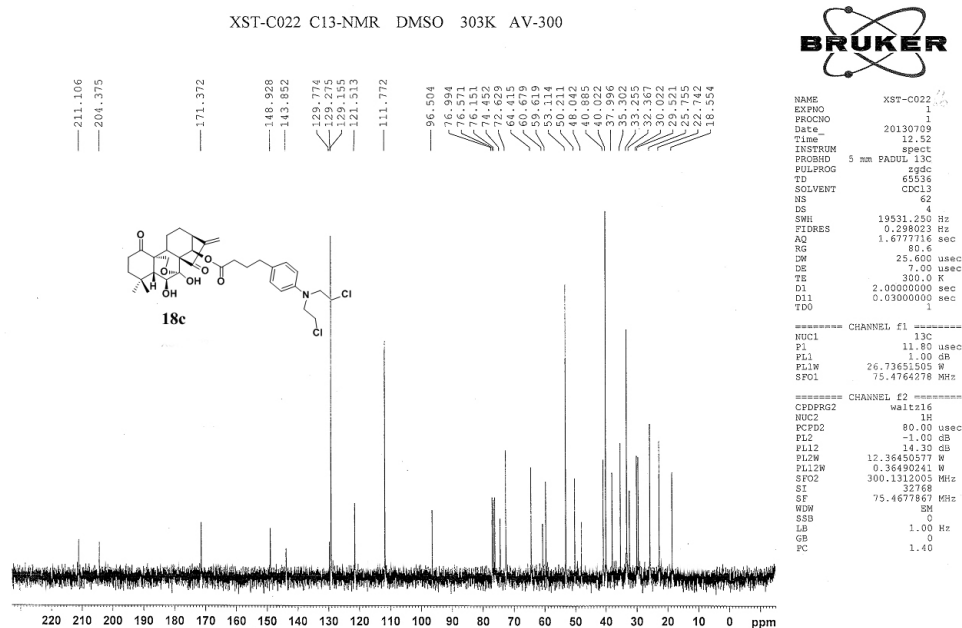

## References:

1. Wang, L.; Li, D. H.; Xu, S. T.; Yao, H. Q.; Zhang, Y. H.; Jiang, J. Y.; Xu, J. Y. The conversion of oridonin to spiro lactone-type or enmein-type diterpenoid: synthesis and biological evaluation of *ent*-6,7-*seco*-oridonin derivatives as novel potential anticancer agents. *Eur. J. Med. Chem.* **2012**, *52*, 242-250.
2. Luo, W.; Zhao, Y. M.; Wang, Y. X.; Xie, S. Q.; Zhao, J.; Wang, C. J. Synthesis and antitumor activity of benzoic nitrogen mustard derivatives. *Acta Pharm. Sinica* **2007**, *42*, 1327-1329. (for benzoic acid mustard)
3. Morris, A. D.; Atassi, G.; Guilbaud, N.; Cordi, A. A. The synthesis of novel melphalan derivatives as potential antineoplastic agents. *Eur. J. Med. Chem.* **1997**, *32*, 343-349.
4. Scutaru, A. M.; Wenzel, M.; Gust, R.; Bivalent bendamustine and melphalan derivatives as anticancer agents. *Eur. J. Med. Chem.* **2011**, *46*, 1604-1615. (for compound 7)

5. Bergel, F.; Stock, J. A. Cyto-active amino-acids and peptides. Part VIII. *N*<sup>α</sup>-acyl, amide, ester and peptide derivatives of melphalan. *J. Chem. Soc.* **1960**, 3658-3669.  
(for compound **8**)
-
